# Supplementary material for: Metal–organic framework-induced mesoporous carbon nanofibers as an ultrastable Na metal anode host
Source: Royal Society of Chemistry journal article supplement (doi:10.1039/d0ta00359j), 2020-01-01
Supplement: d0ta00359j1.pdf [file d0ta00359j1.pdf]

## Supplementary Information

### Metal organic framework-induced Mesoporous Carbon Nanofibers as Ultrastable Na Metal Anode Host

#### Bimetallic MOF Synthesis

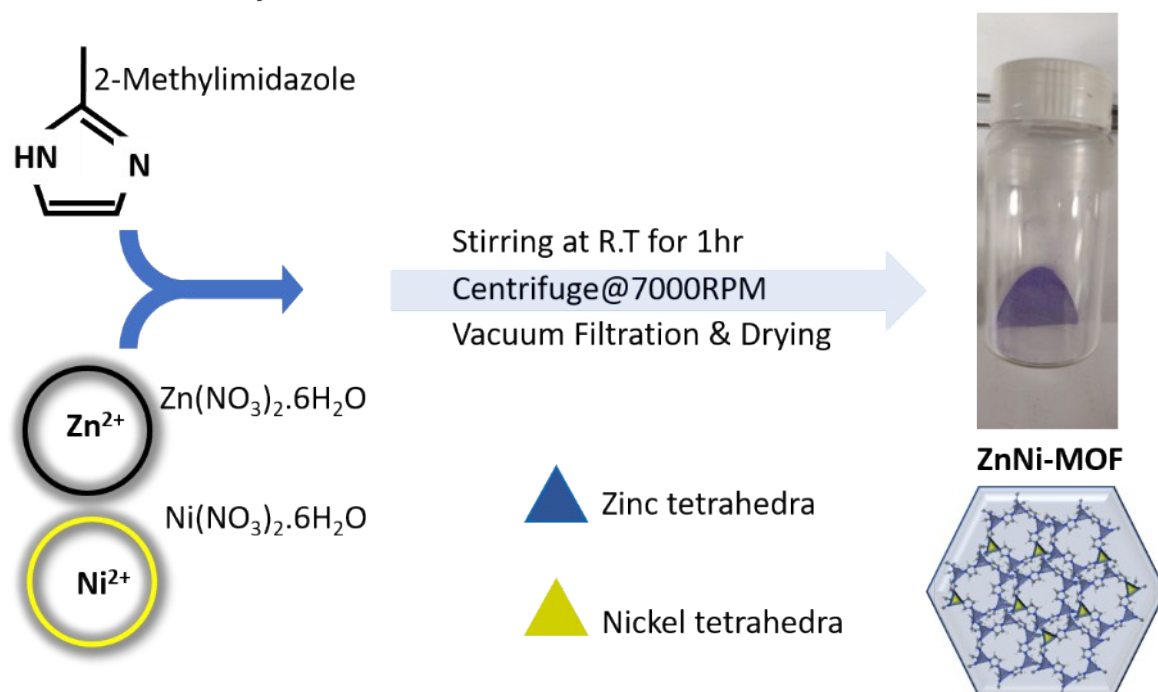

Fig. S1. A schematic representation of bimetallic MOF synthesis. Purple and yellow triangles represent Zinc and Ni atomic clusters, respectively, while pentagonal ring structure is associated with imidazole ligand.

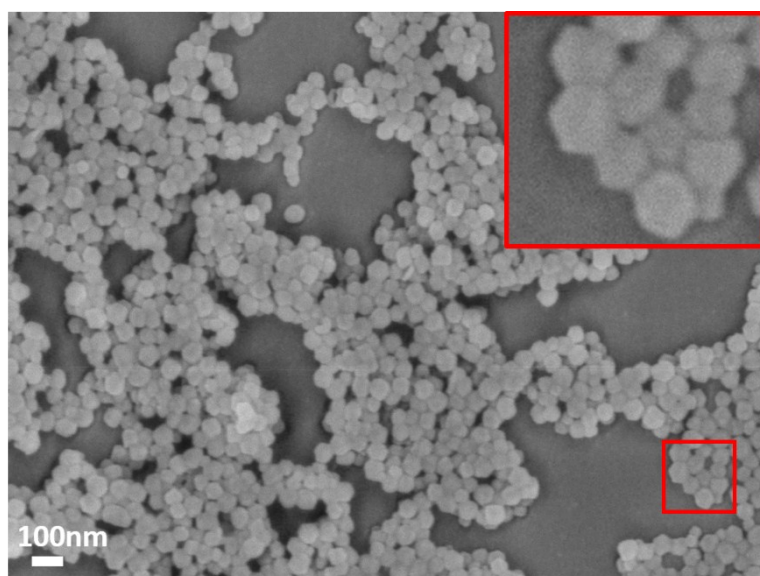

Fig. S2. SEM micrograph of synthesized MOF nanoparticles with a truncated dodecahedral geometry and ~50 nm in diameter. Inset shows a magnified view of nanoparticles.

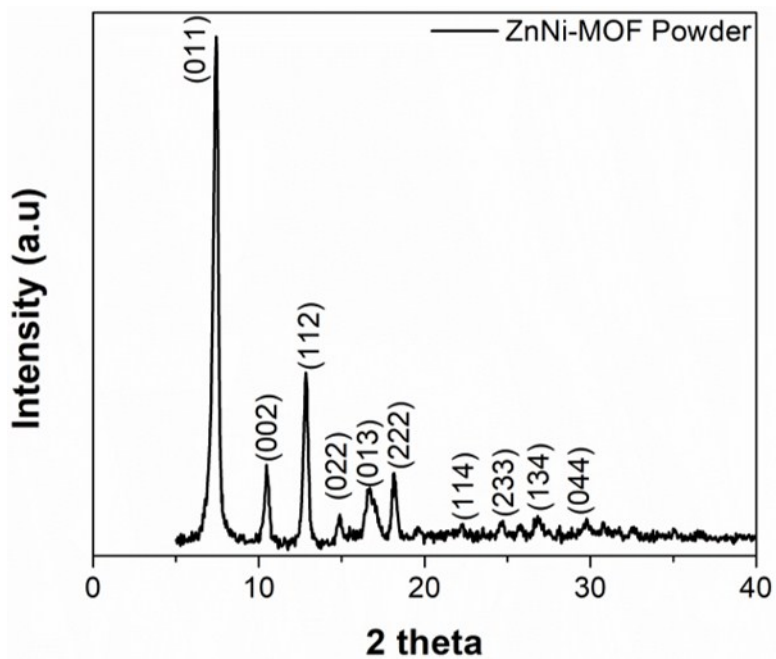

Fig. S3. XRD spectrum of MOF nanoparticles showing characteristic peaks

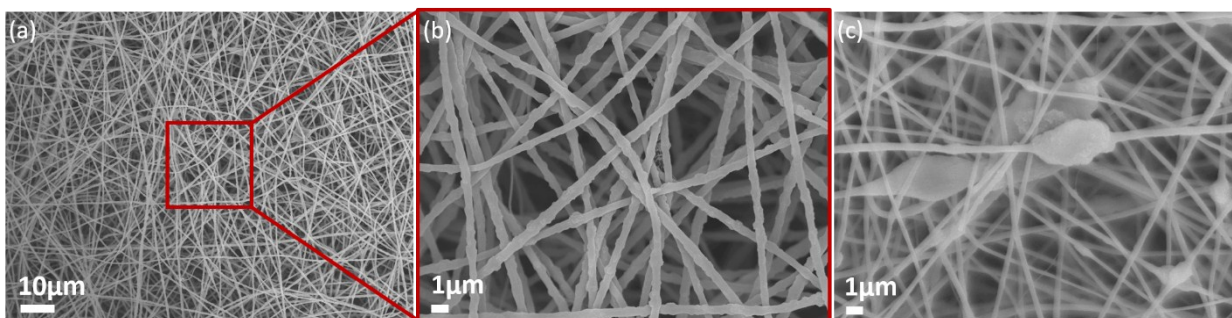

Fig. S4. SEM micrographs of MCNFs with (a-b) an optimized MOF concentration for uniform dispersion and (c) an excessive MOF concentration causing agglomeration.

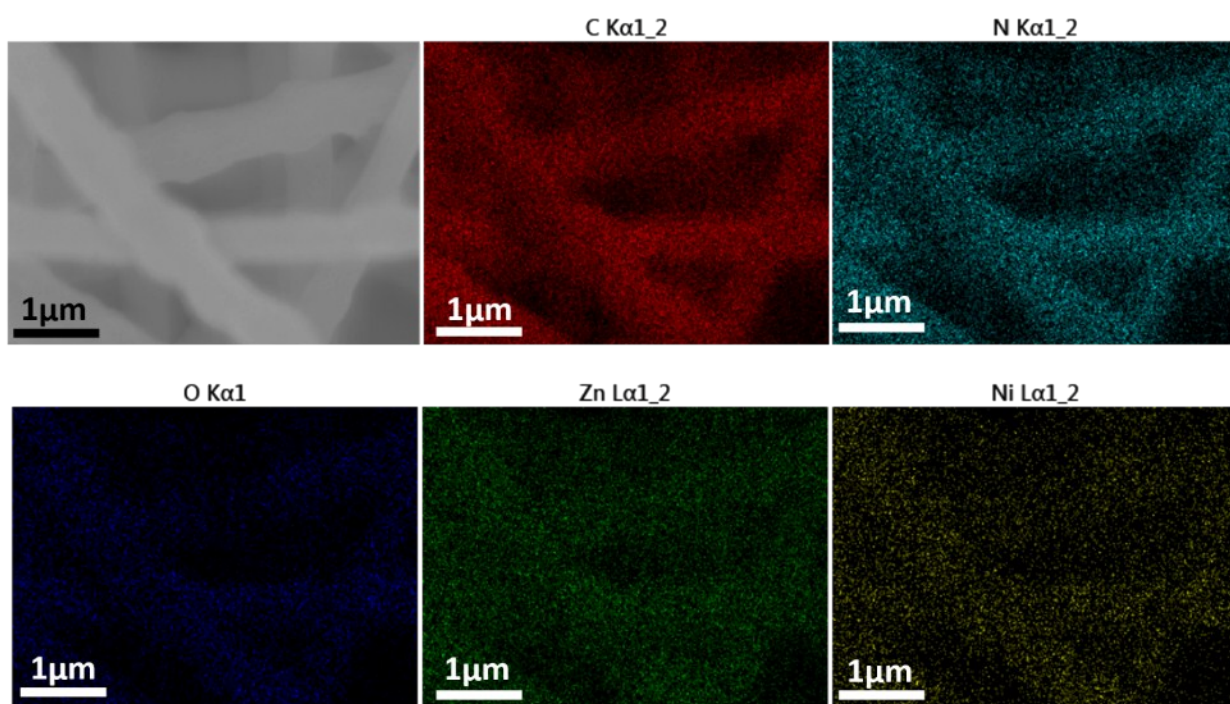

Fig. S5. SEM image and EDX elemental maps of PCNF-800.

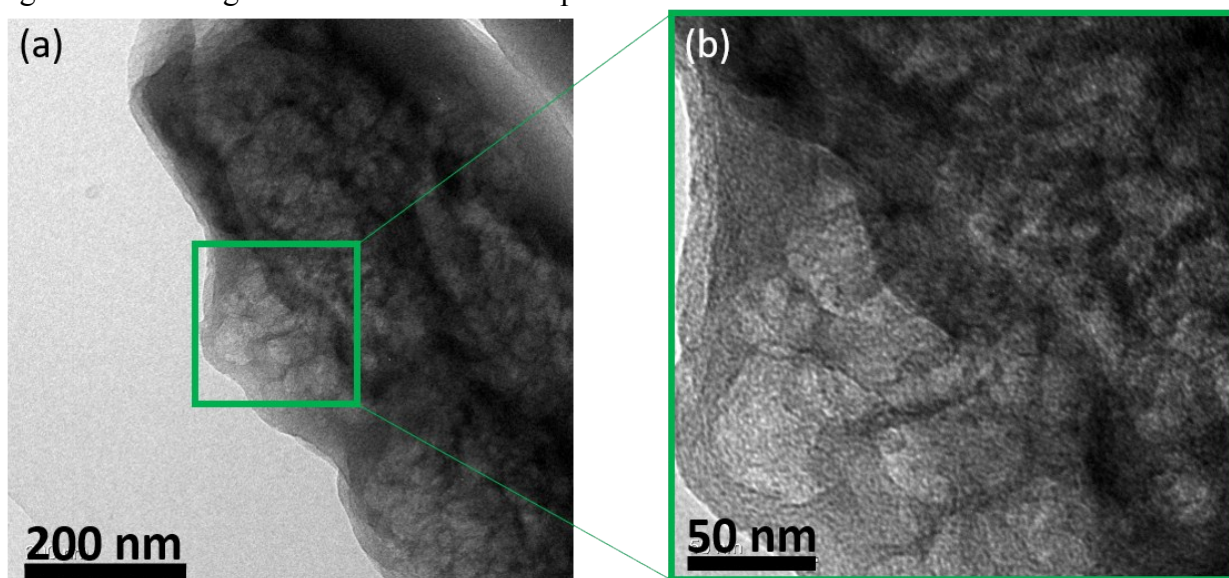

Fig. S6. HRTEM images of PCNFs showing mesopores of size below 50 nm upon decomposition of MOF and contraction by carbonization.

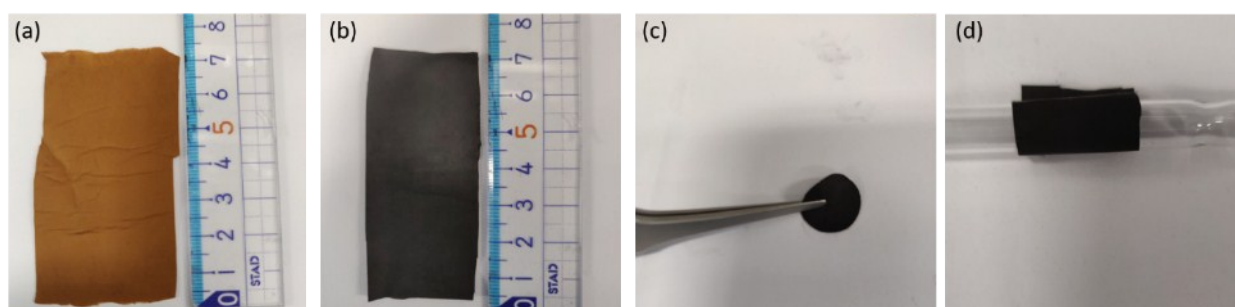

Fig. S7. Digital images of PCNF (a) before (b-d) after carbonization.



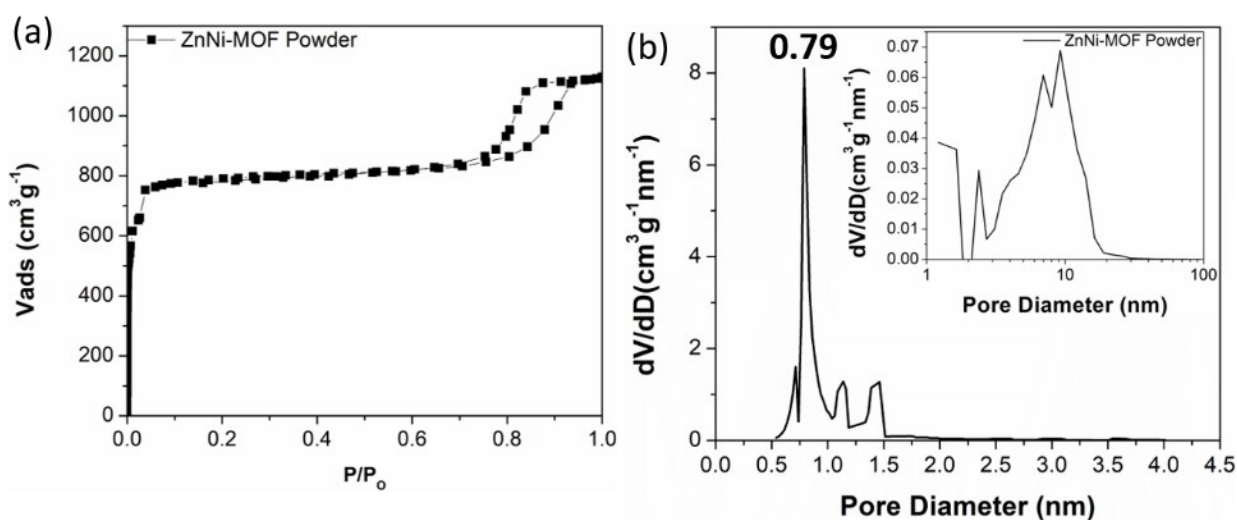

Fig. S8. (a) Nitrogen adsorption/desorption isotherm; and (b) Pore size distribution of MOF nanoparticles with HK micropores: BJH pore size distribution in inset.

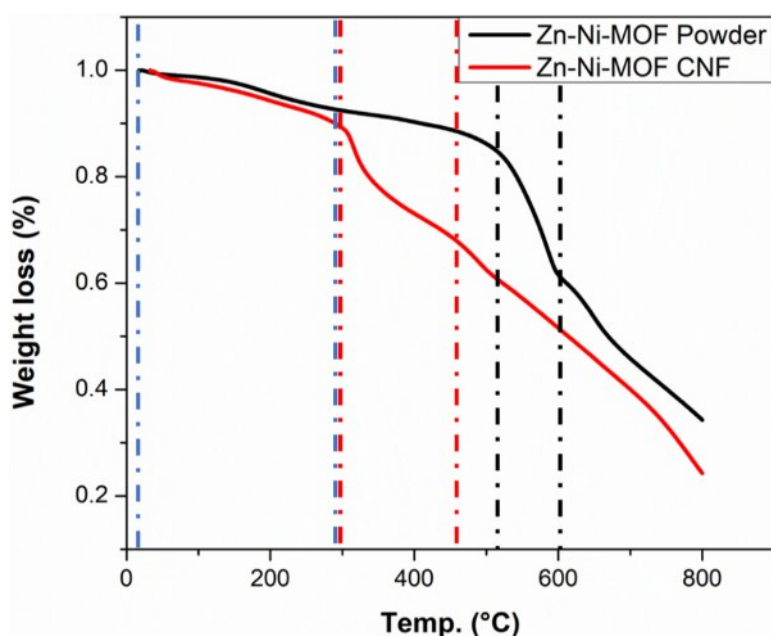

Fig. S9. TGA curves of bimetallic MOF powder and MOF CNF obtained in an Ar atmosphere.

The pores inevitably generated a large number of defects in the carbon network, which were quantified via the Raman spectroscopic analysis (Fig. S10). The peaks located at  $1350\text{ cm}^{-1}$  and  $1595\text{ cm}^{-1}$  can be attributed to the disordered (D) and ordered, or graphitic (G), carbon, respectively.<sup>S1</sup> As expected, the PCNF films carbonized at a low temperature of  $700\text{ °C}$  exhibited the highest  $I_D/I_G$  ratio of 1.64 due to the presence of a large quantity of disordered structures. Increasing the carbonization temperature led to a steady decrease in  $I_D/I_G$  ratio. The pristine CNF films exhibited much sharper G peaks corroborating their more ordered structure than the mesoporous PCNFs. Nevertheless, both

CNFs and PCNFs possessed predominantly amorphous structures as verified by the XRD analysis (Fig. S11).

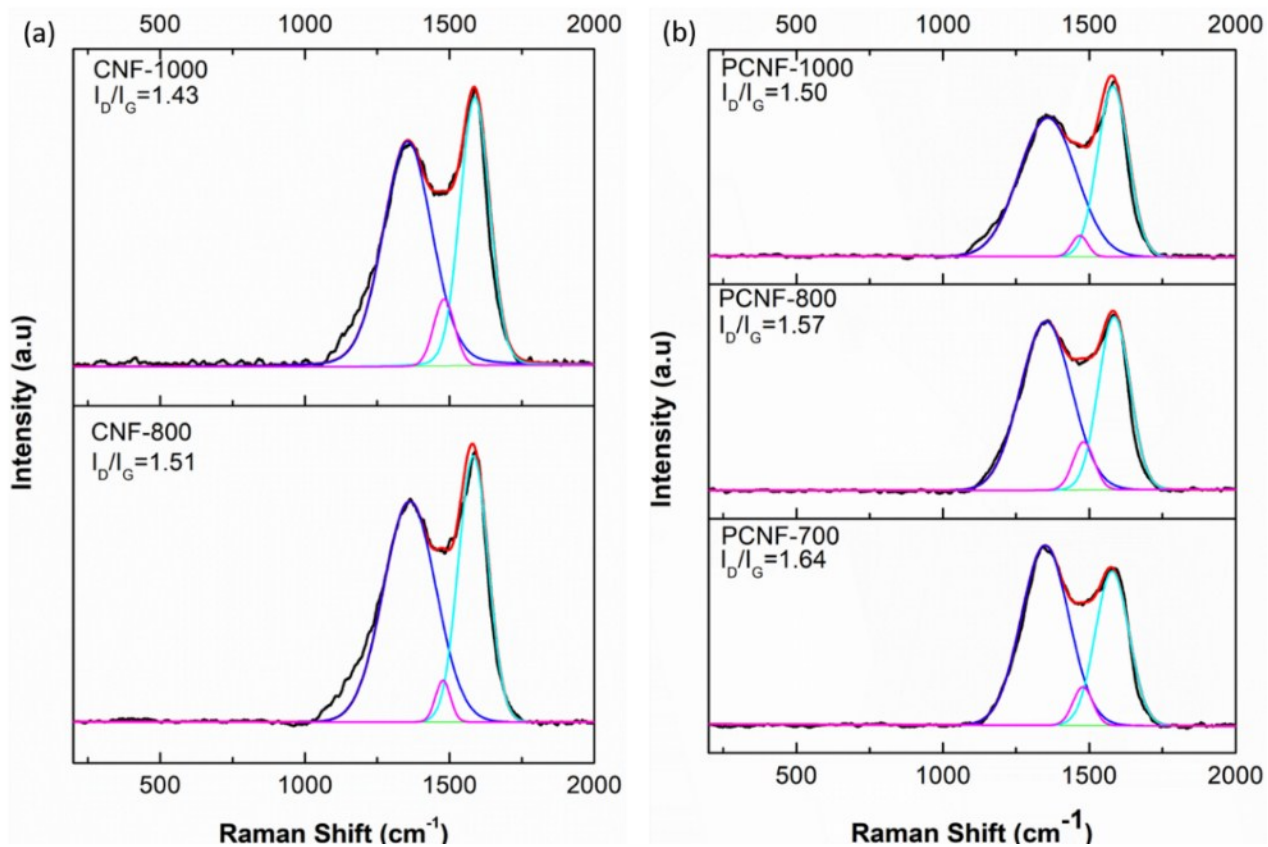

Fig. S10. Raman spectra of (a) CNFs and (b) PCNFs taken at different carbonization temperatures.

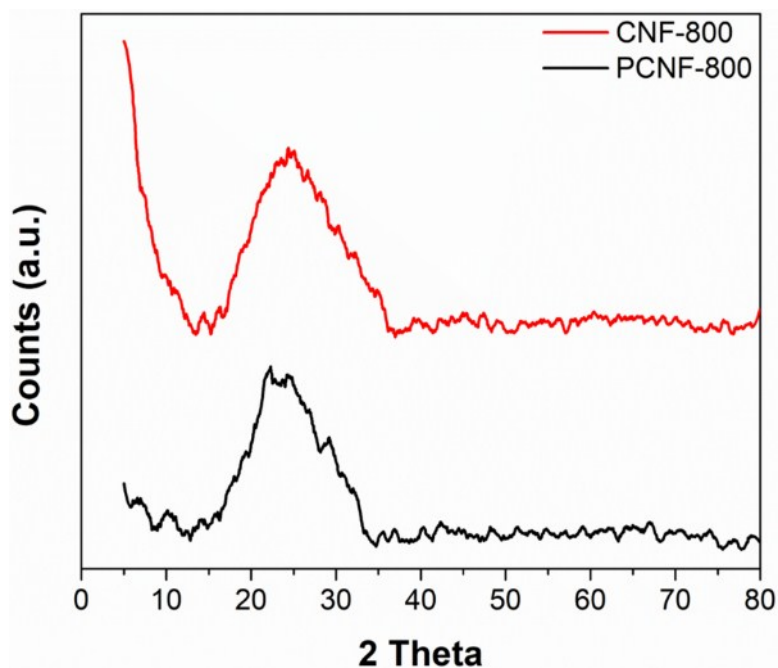

Fig. S11. XRD spectra of CNF and PCNF carbonized at  $800^\circ\text{C}$ .

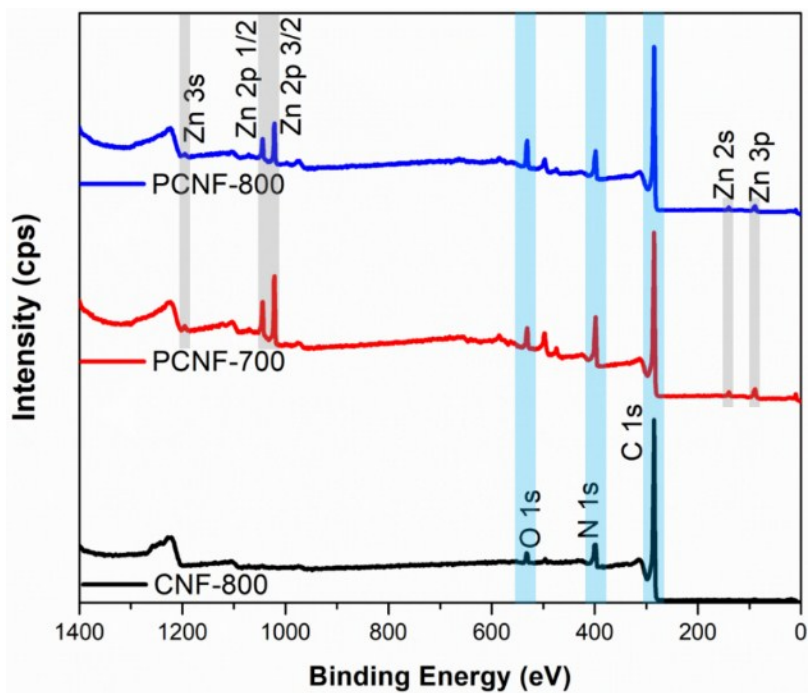

Fig. S12. XPS survey spectra of CNF and PCNF.

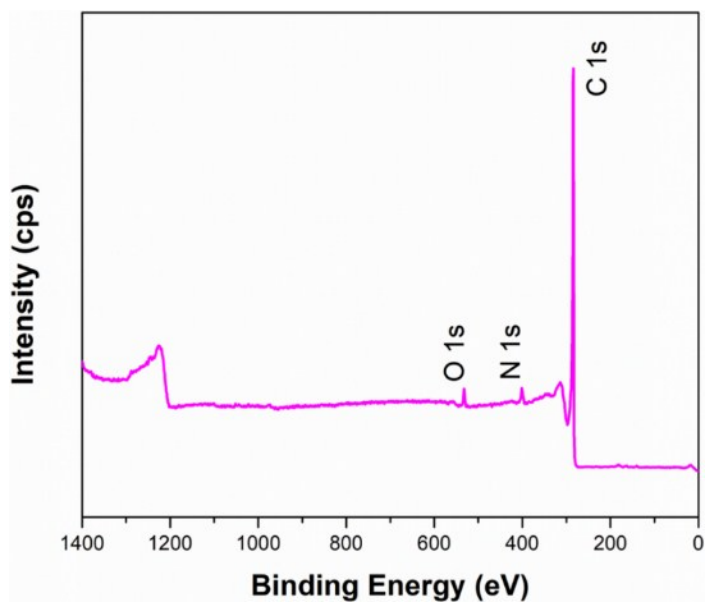

Fig. S13. XPS survey spectrum of PCNF-1000.

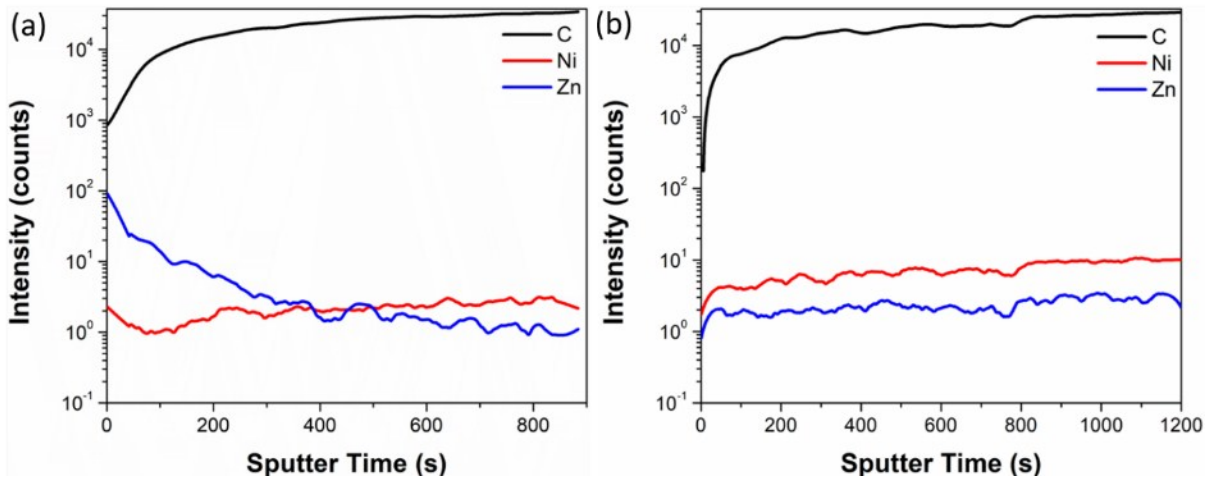

Fig. S14. TOF-SIMS profiles of (a) PCNF-800 and (b) PCNF-1000.

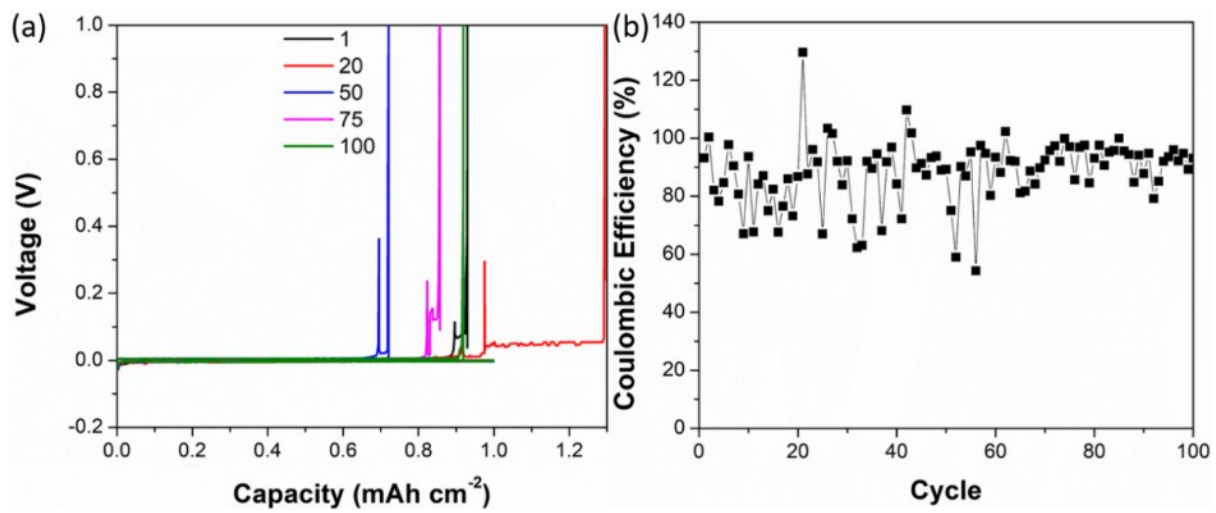

Fig. S15. (a) Half-cell voltage profiles; and (b) Coulombic efficiencies of Cu foil current collector.

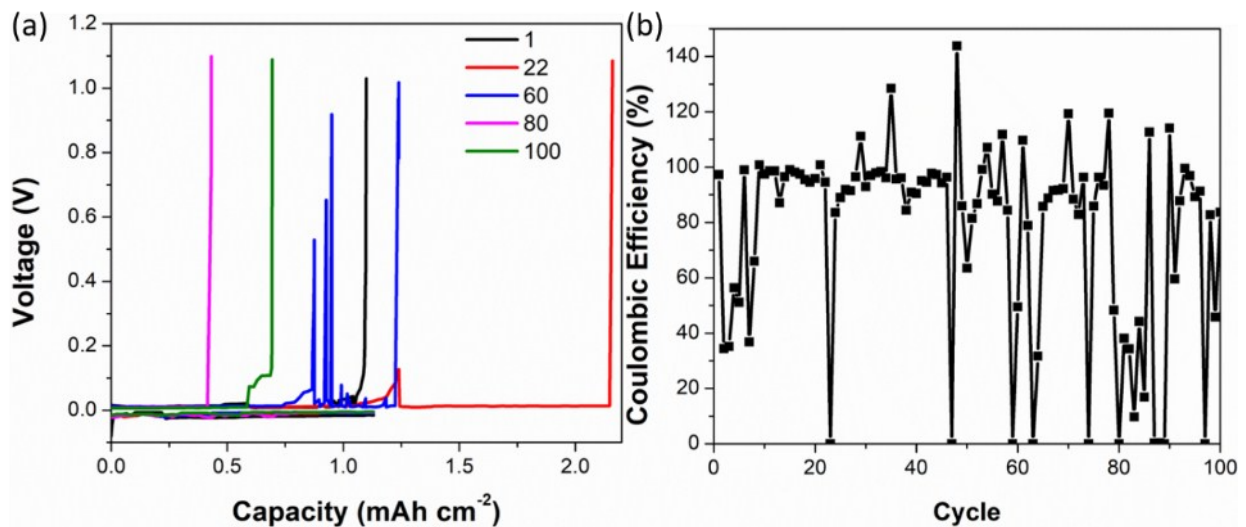

Fig. S16. (a) Half-cell voltage profiles; and (b) Coulombic efficiencies of Al foil current collector.

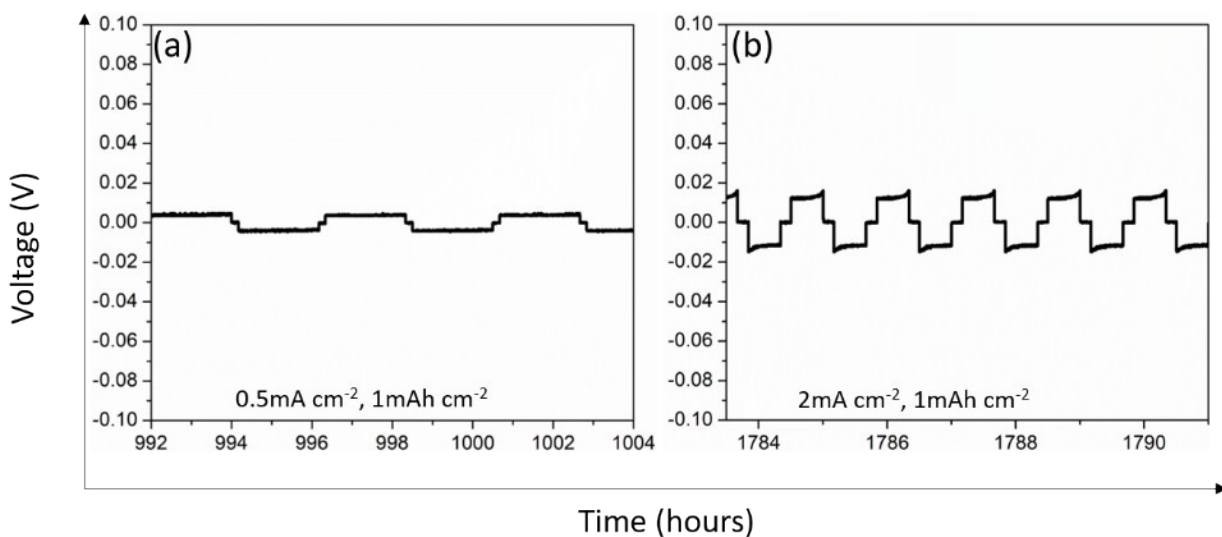

Fig. S17. Magnified views of voltage vs time curves of PCNF-700 symmetric cell at different cycle times and current densities: (a) at 0.5 mA cm<sup>-2</sup> and 1 mAh cm<sup>-2</sup>; and (b) at 2 mA cm<sup>-2</sup> and 1 mAh cm<sup>-2</sup>.

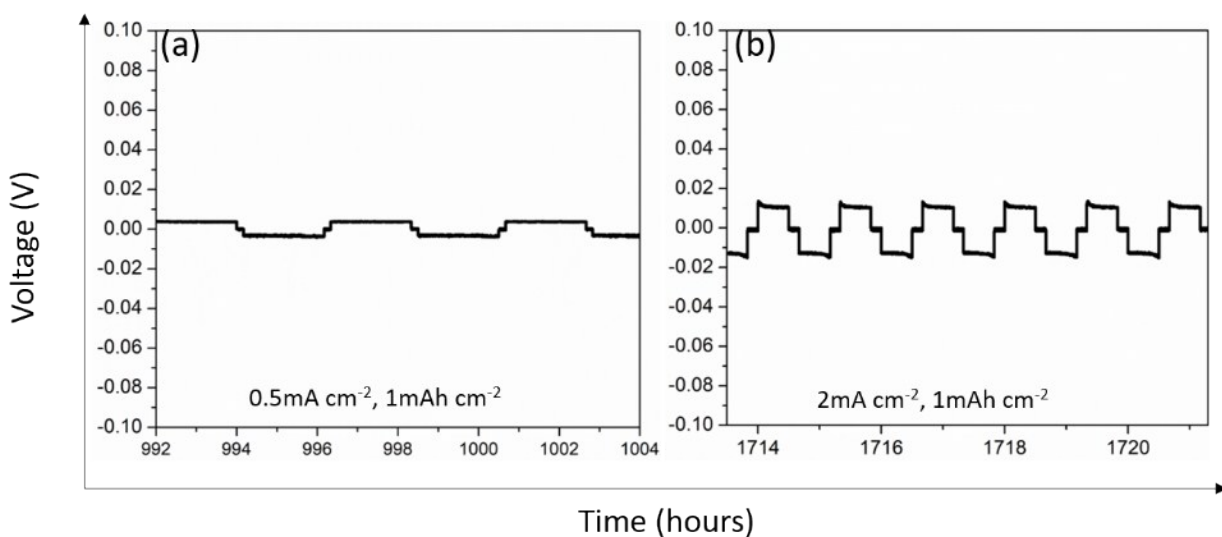

Fig. S18. Magnified views of voltage vs time curves of PCNF-800 symmetric cell at different cycle times and current densities: (a) at 0.5 mA cm<sup>-2</sup> for 1 mAh cm<sup>-2</sup>; and (b) at 2 mA cm<sup>-2</sup> for 1 mAh cm<sup>-2</sup>.



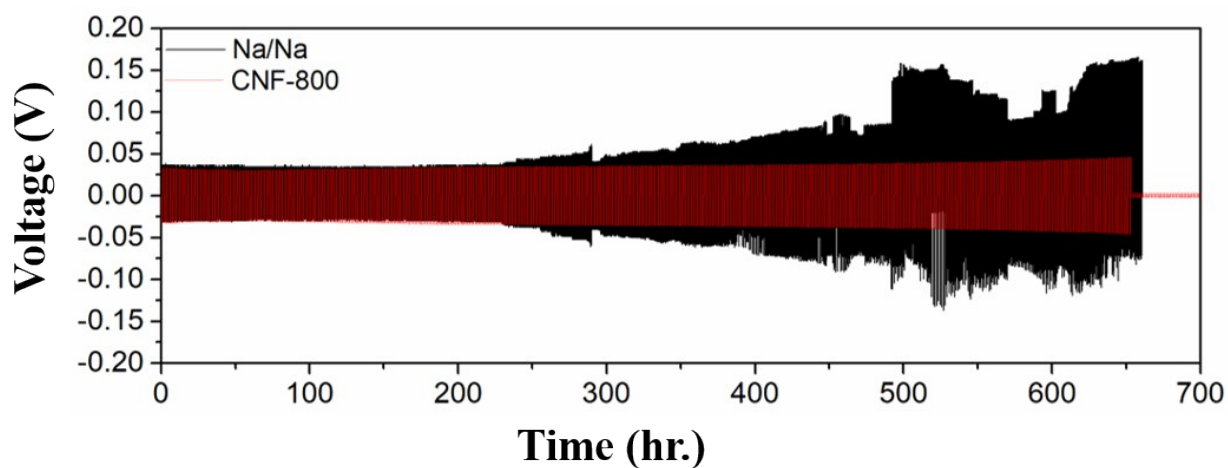

Fig. S19. Symmetric cell performance of Na/Na and CNF-800 electrode at  $1\text{mA cm}^{-2}$  for a capacity of  $1\text{mAh cm}^{-2}$ .

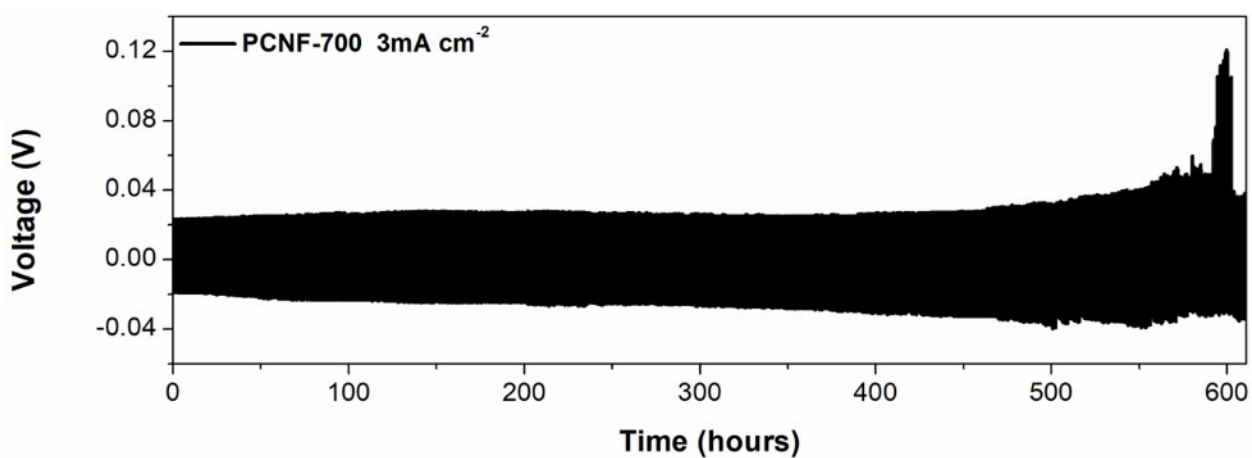

Fig. S20. Symmetric cell performance of the PCNF-700 electrode at a current density of  $3\text{mA cm}^{-2}$  for a capacity of  $1\text{mAh cm}^{-2}$ .

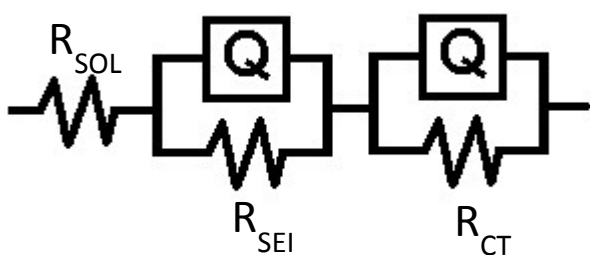

Fig. S21. Equivalent fitting circuit for EIS measured data.

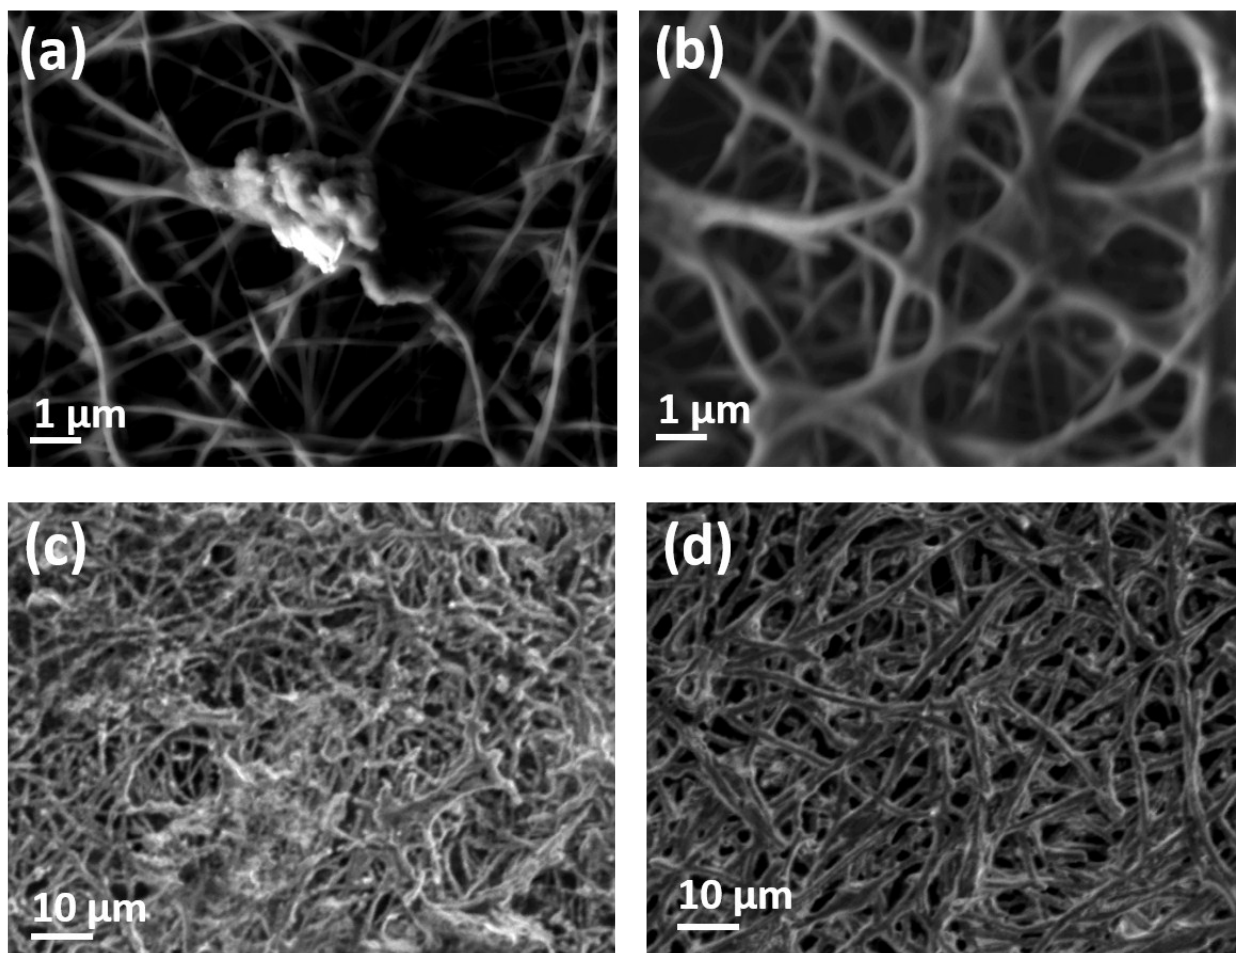

Fig. S22. Na plating behavior examined at a current density of  $1 \text{ mA cm}^{-2}$ . *Ex Situ* SEM images of (a) CNF-800 and (b) PCNF-800 hosts taken at the initial stage; and of (c) CNF-800 and (d) PCNF-800 hosts after plating of  $0.3 \text{ mAh cm}^{-2}$ .

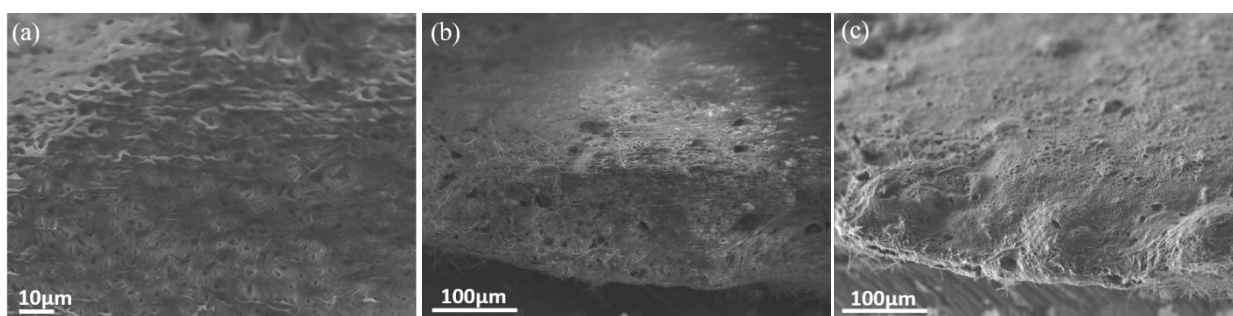

Fig. S23. *Ex-situ* cross-sectional SEM micrographs of the PCNF-800 electrodes tested at different current densities and areal capacities: (a)  $2 \text{ mA cm}^{-2}$  for  $2 \text{ mAh cm}^{-2}$ ; (b)  $3 \text{ mA cm}^{-2}$  for  $3 \text{ mAh cm}^{-2}$ ; and (c)  $5 \text{ mA cm}^{-2}$  for  $3 \text{ mAh cm}^{-2}$ .

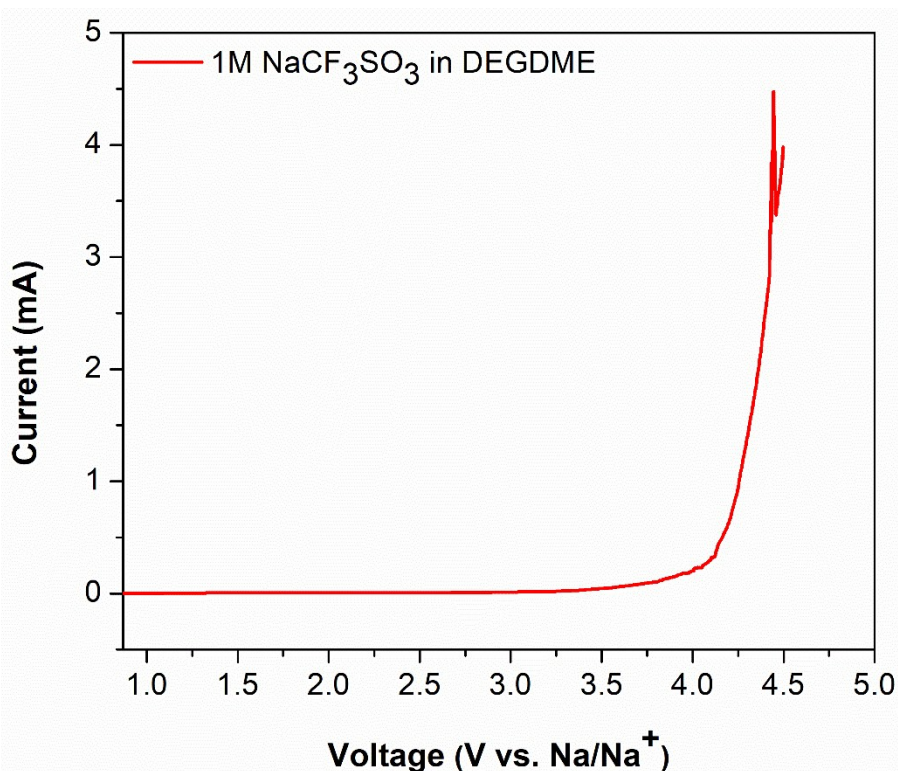

Fig S24. LSV curve that determines the electrochemical stability window of 1M NaCF<sub>3</sub>SO<sub>3</sub> DEGDME electrolyte using SS as the working electrode and Na foil as reference and counter electrode at a scan rate of 0.5 mV/s.

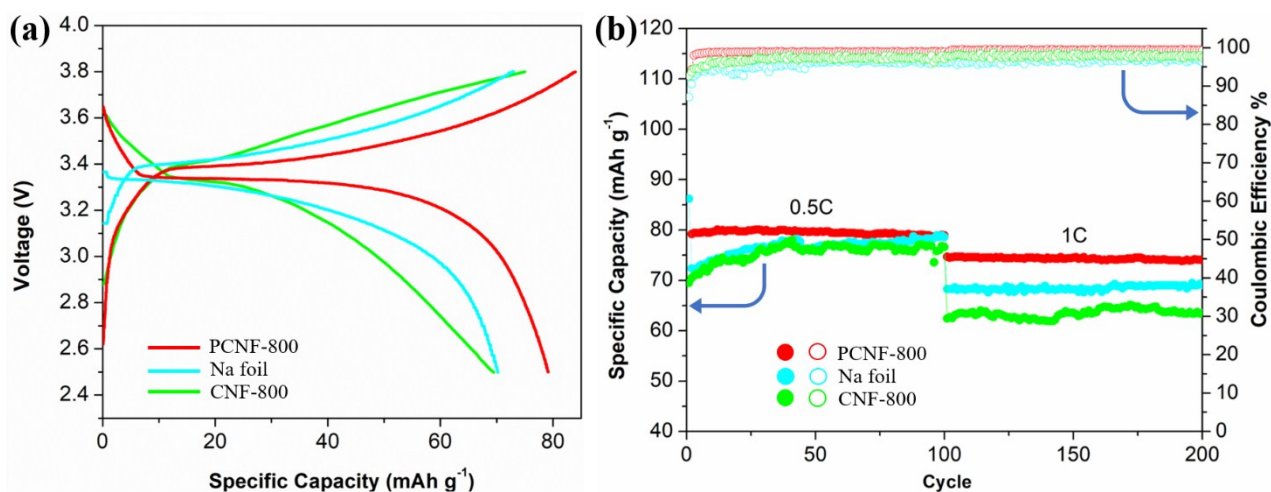

Fig S25. Electrochemical performance of full cells. (a) GCD profiles at 0.5 C, and (b) Cyclic performance at different current densities of full cells consisting of Na@PCNF-800/NVP, Na@CNF-800/NVP, or Na foil as the anode and NVP/C as the cathode.

## Density Functional Theory (DFT) Calculations

The density functional theory (DFT) calculations were performed based on the first principles theory using Vienna *Ab-initio* Simulation Package (VASP)<sup>S2</sup> with a projected augmented wave approach.

The exchange-correlation functional energy was processed by the Perdew-Burke-Ernzerhof (PBE)

function within the generalized gradient approximation (GGA).<sup>S3,4</sup> The kinetic energy cutoff was set to 520 eV with the total energy converged to  $10^{-5}$  eV. All optimized structures were obtained by fully relaxing atomic positions until the Hellmann–Feynman forces on all atoms were smaller than 0.02 eV/Å. For the relaxation of multilayer carbon structure, a  $2 \times 3$  in-plane supercell was adopted with representative AB stacking three layers to accurately describe the interlayer C-C interaction.<sup>S5</sup> The bottom carbon layer was fixed, representing the artificial multilayer of the carbon structure. The Brillouin zone was represented by a gamma-centered k-point grid of  $5 \times 5 \times 1$ . To avoid the periodic image interaction between the two nearest neighbor unit cells, the vacuum was set to 40 Å in the *c*-axis. The whole multilayer structure optimization was carried out by considering the van der Waals corrected density functional theory (DFT-DF2) proposed by Langreth and Lundqvist et al.<sup>S6</sup> to overcome the deficiencies of DFT in treating dispersion interactions between the interlayer atoms. The adsorption energy of a Na single atom on the surface of multi-layer carbon structure was obtained from Equation (S1).

$$E_{ad} = E_{NHG + Na} - E_{NHG} - \mu_{Na}, \quad (S1)$$

where  $E_{NHG + Na}$  and  $E_{NHG}$  are the total energies of multi-layer carbon structure with and without Na adatom, and  $\mu_{Na}$  is the energy of Na leveled from the atomic state. The adsorption sites of single Na atom are optimally selected on all multilayer carbon structure with a defect in proximity to the functional groups. The charge transfer between the Na atom and multi-layer carbon structure was evaluated by Equation (S2)

$$\Delta\rho = \rho_{NHG + Na} - \rho_{NHG} - \rho_{Na}, \quad (S2)$$

where  $\rho_{NHG + Na}$ ,  $\rho_{NHG}$  and  $\rho_{Na}$  are the charge densities of Na-adsorbed structures, multi-layer carbon, and isolated Na atom, respectively. The structures were visualized and plotted using Vesta software.<sup>S7</sup>



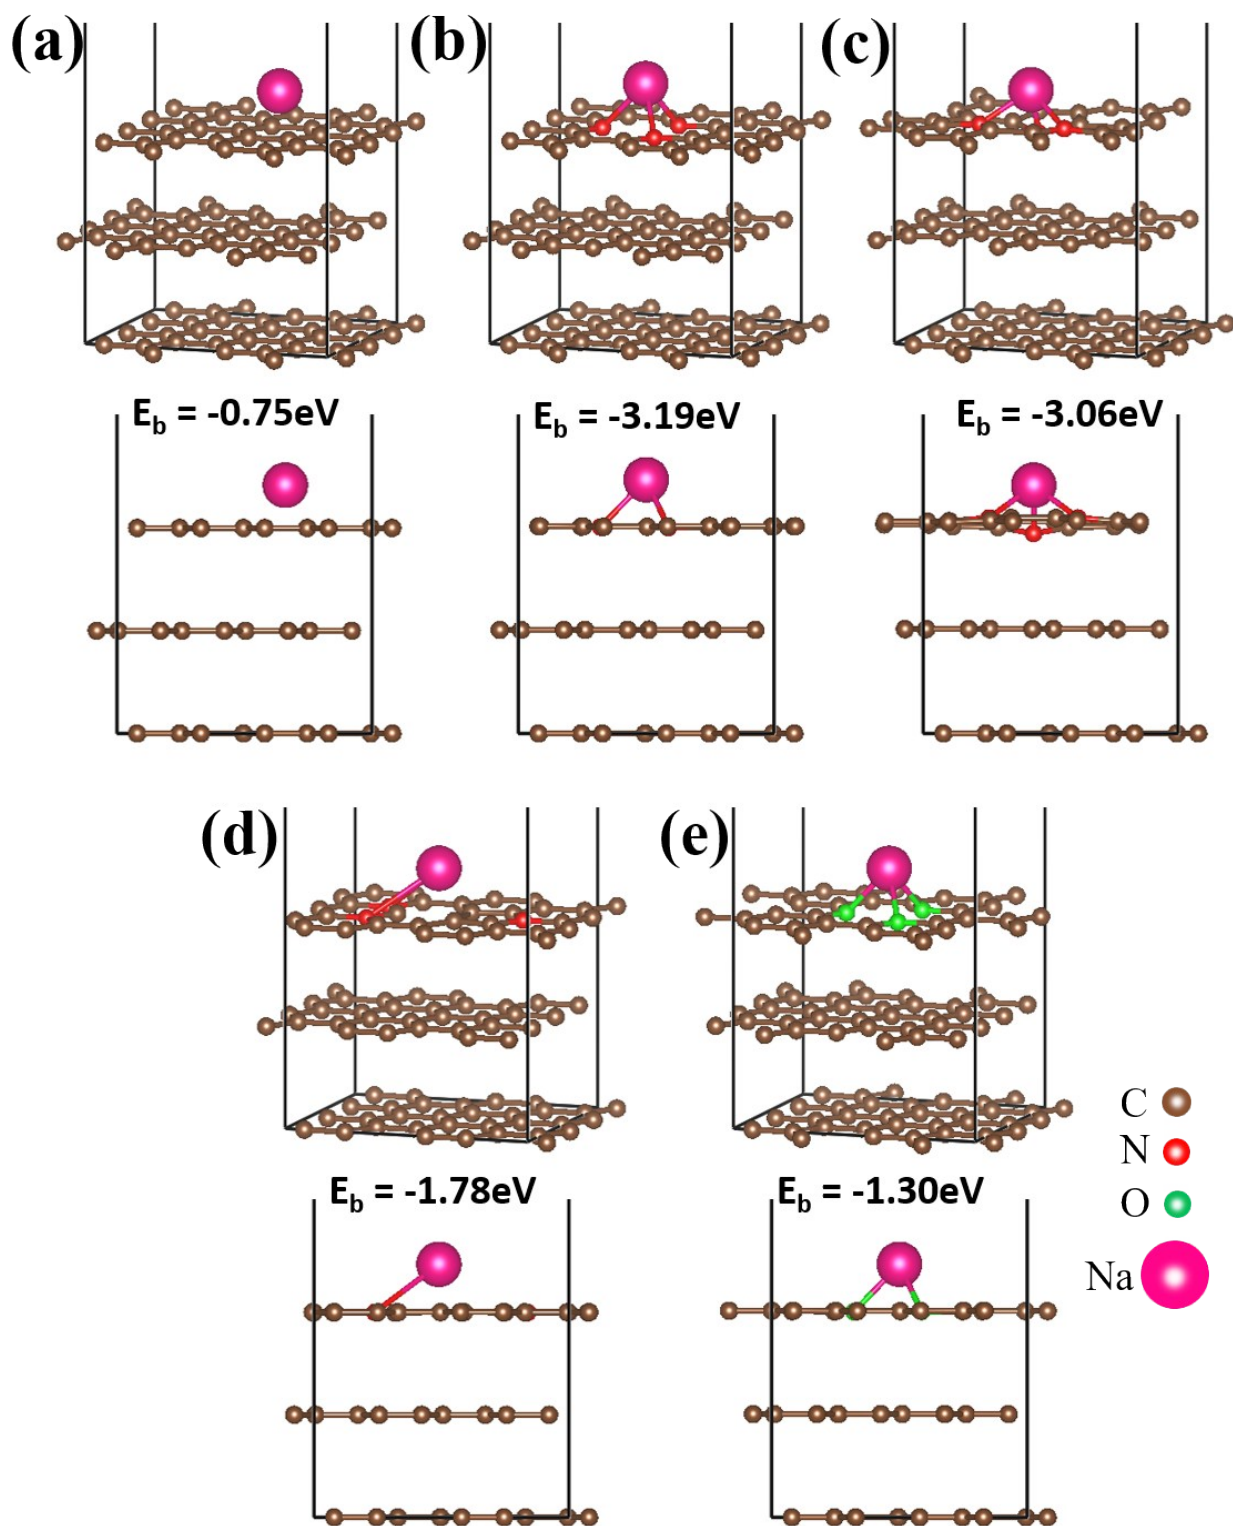

Fig. S26. Optimized structures of multilayer carbon system after relaxation. Standard orientation and side views (a) defect-free graphite, (b) pyridinic-N (c) pyrrolic-N (d) graphitic-N (e) carbonyl groups on defective carbon structure.

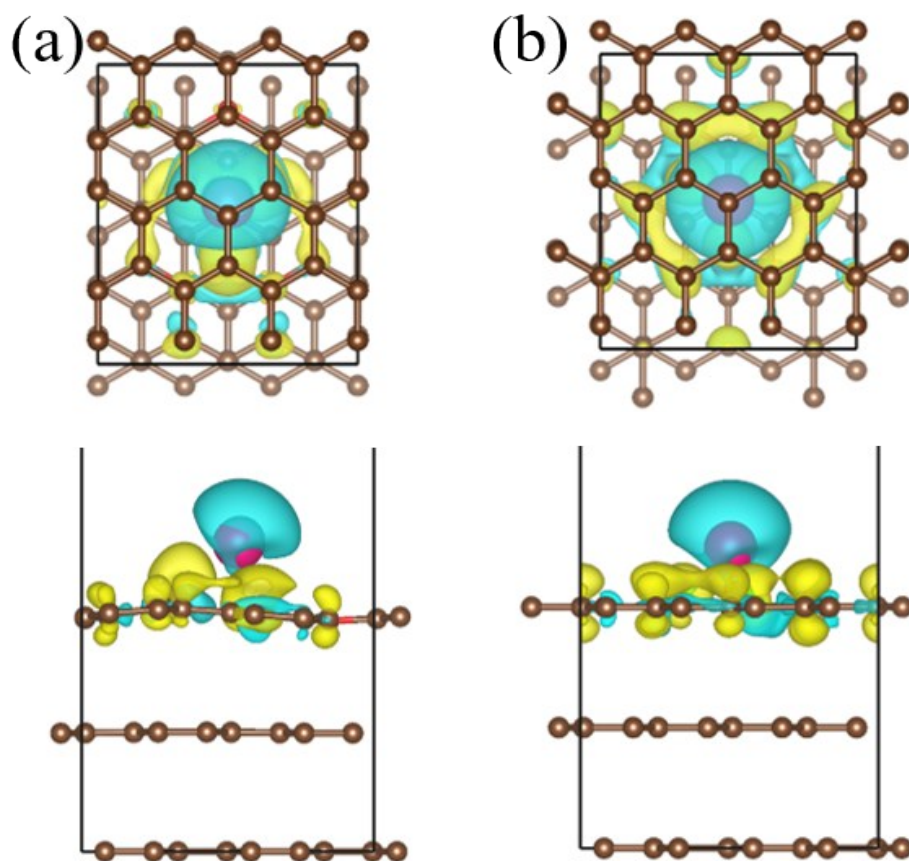

Fig. S27. Charge density difference plots of (a) graphitic-N (G-N) (b) carbonyl group (=CO) on defective carbon structure.

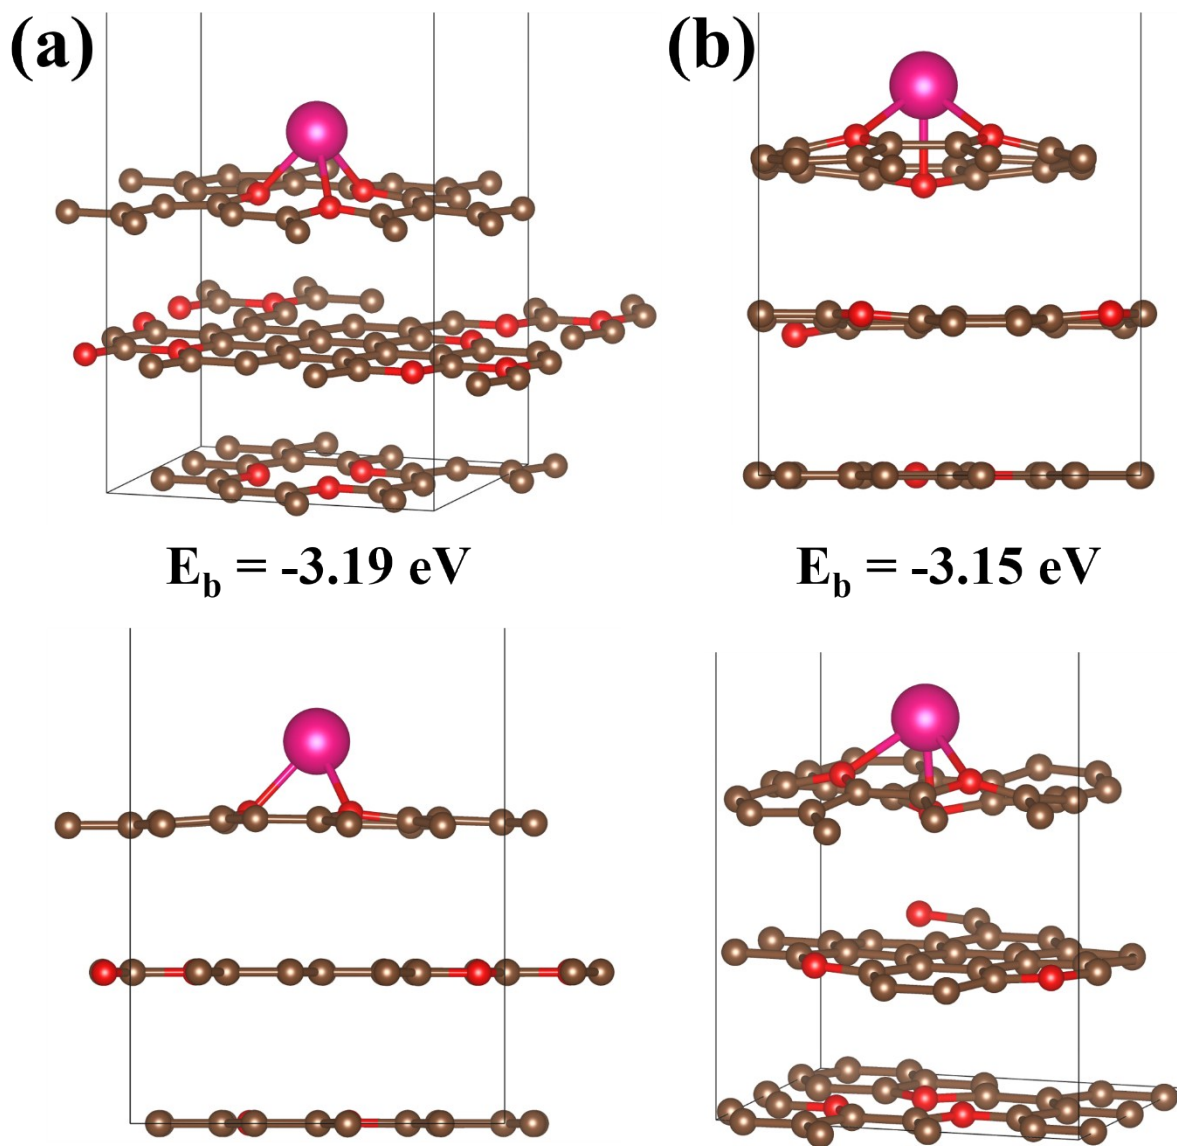

Fig S28. Optimized structures of multilayer carbon system with extensive defects and functional groups after relaxation. Standard orientation and side views (a) pyridinic-N and (b) pyrrolic-N groups in all carbon layers

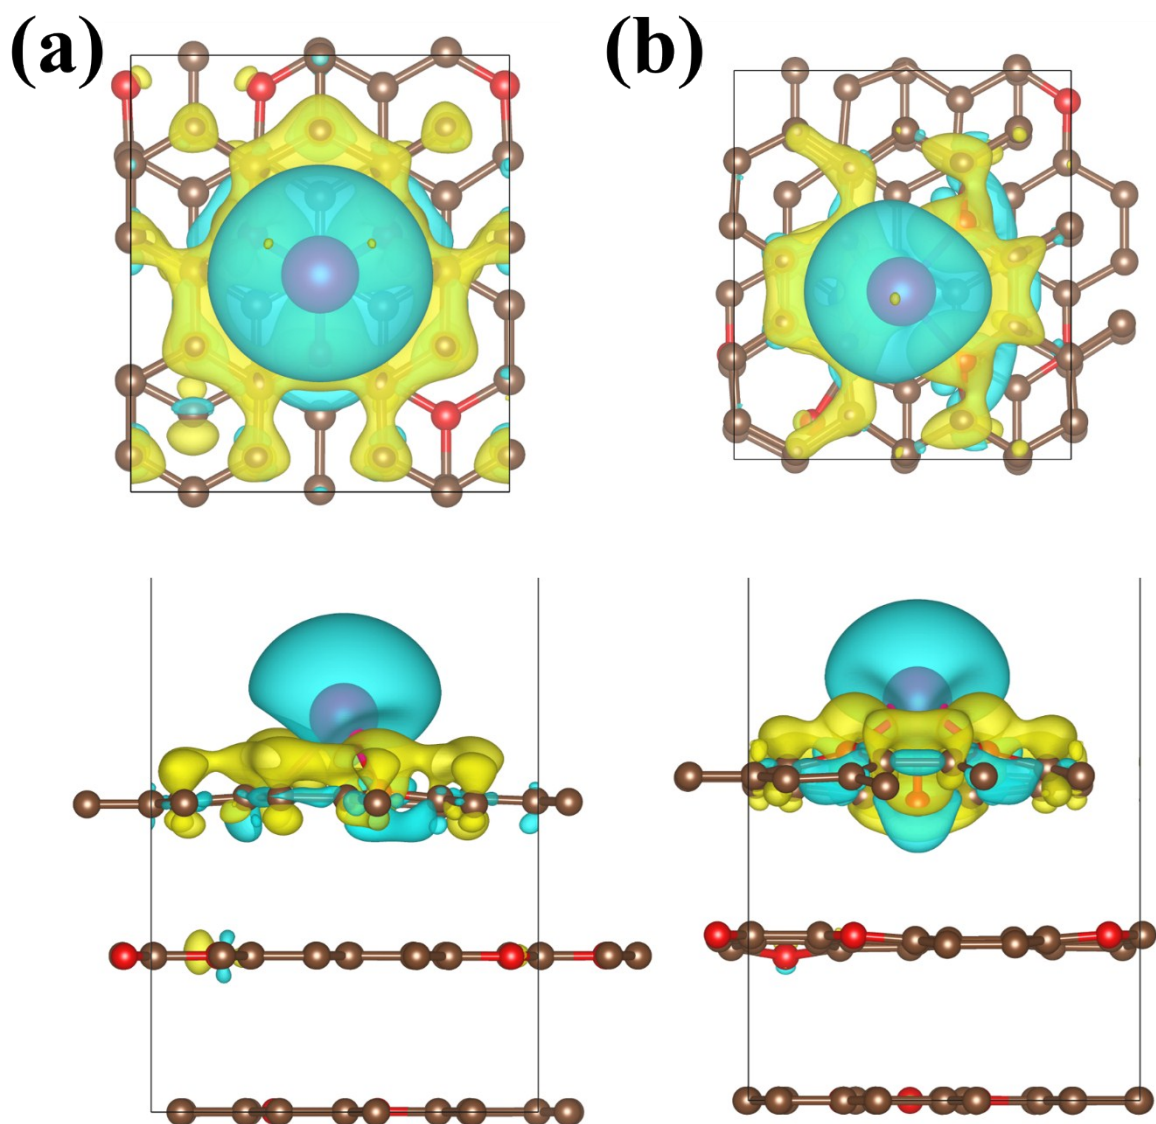

Fig S29. Charge density difference plots with extensive defects and functional groups (a) pyridinic-N and (b) pyrrolic-N in all carbon layers.

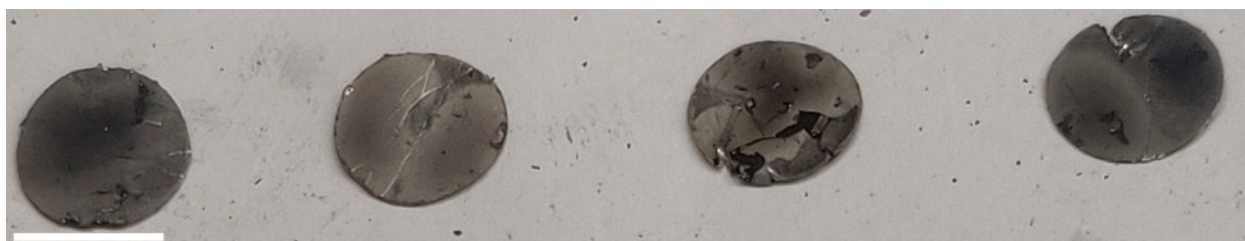

Fig. S30. Photographic snapshots of multiple PCNF-800 electrodes indicating successful melt infiltration of Na. Scale bar = 10 mm.



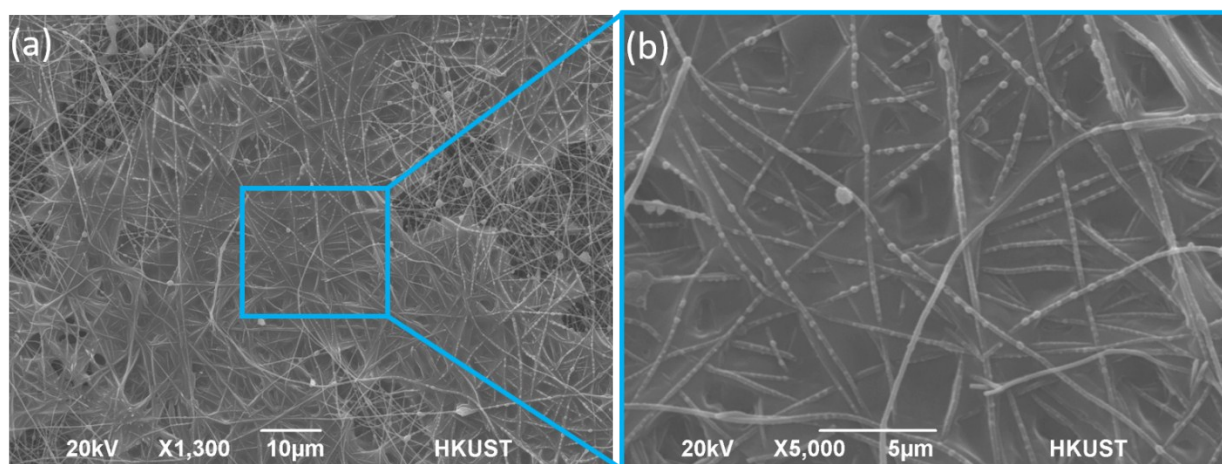

Fig. S31. SEM micrographs showing uniform Na infusion through the entire carbon structure.

The electronic conductivities increased with increasing carbonization temperature, also aided by the catalytic graphitization of Ni nanoparticles that created highly conductive, ordered short-range domains around them. This is evident from the highest conductivity of 2.84 S/cm achieved by the PCNF electrode carbonized at 1,000°C among different CNFs (Table S1).

Table S1. BET surface areas, pore volumes and electrical conductivities of neat CNFs and PCNFs.

| <b>Materials</b>   | <b>Surface Area<br/>[m<sup>2</sup>/ g<sup>-1</sup>]</b> | <b>Pore Volume<br/>[cm<sup>3</sup> g<sup>-1</sup>]</b> | <b>Electrical<br/>Conductivity [S cm<sup>-1</sup>]</b> |
|--------------------|---------------------------------------------------------|--------------------------------------------------------|--------------------------------------------------------|
| <b>CNF-800°C</b>   | 10.9                                                    | 0.095                                                  | 0.90                                                   |
| <b>PCNF-700°C</b>  | 129.6                                                   | 0.194                                                  | 0.86                                                   |
| <b>PCNF-800°C</b>  | 187.3                                                   | 0.351                                                  | 1.21                                                   |
| <b>PCNF-1000°C</b> | 210.8                                                   | 0.335                                                  | 2.84                                                   |

Table S2. Elemental compositions and percentage of individual functional groups for neat CNFs and PCNFs.

| Materials<br>[At. conc. %]<br>[%] | C           |     |     |       | O          |     | N           |      |     |     | Zn         |
|-----------------------------------|-------------|-----|-----|-------|------------|-----|-------------|------|-----|-----|------------|
|                                   | C-C         | C=C | C=O | C-C=O | C-OH       | C=O | Pr-N        | Py-N | G-N | O-N |            |
| <b>CNF-800</b>                    | <b>88.8</b> |     |     |       | <b>1.7</b> |     | <b>9.5</b>  |      |     |     | <b>-</b>   |
|                                   | 53          | 34  | 5   | 8     | 77         | 23  | 33          | 48   | 8   | 11  |            |
| <b>PCNF-700</b>                   | <b>80.3</b> |     |     |       | <b>3.2</b> |     | <b>14.7</b> |      |     |     | <b>1.8</b> |
|                                   | 45          | 34  | 9   | 12    | 75         | 25  | 49          | 27   | 16  | 8   |            |
| <b>PCNF-800</b>                   | <b>84.6</b> |     |     |       | <b>4.5</b> |     | <b>9.8</b>  |      |     |     | <b>1.1</b> |
|                                   | 48          | 28  | 12  | 12    | 72         | 28  | 42          | 42   | 4   | 12  |            |
| <b>PCNF-1000</b>                  | <b>93.0</b> |     |     |       | <b>2.9</b> |     | <b>4.1</b>  |      |     |     | <b>-</b>   |
|                                   | 57          | 21  | 8   | 14    | 78         | 22  | 35          | 36   | 15  | 14  |            |

Pr-N, Py-N, G-N and O-N are Pyridinic-N, Pyrrolic-N, Graphitic-N and Oxidized-N functional groups respectively.

Table S3. Impedance parameters obtained from EIS Nyquist spectra of the PCNF-800 electrode.

| Time (hr]                                    | 0    | 10   | 100  | 300  | 500  | 700  | 1000 |
|----------------------------------------------|------|------|------|------|------|------|------|
| <b>R<sub>SOL</sub> (<math>\Omega</math>)</b> | 2.22 | 2.39 | 2.38 | 2.62 | 2.64 | 2.63 | 2.66 |
| <b>R<sub>SEI</sub> (<math>\Omega</math>)</b> | 5.77 | 2.72 | 2.34 | 0.96 | 1.24 | 1.20 | 1.32 |
| <b>R<sub>CT</sub> (<math>\Omega</math>)</b>  | 5.42 | 1.99 | 1.27 | 2.13 | 2.39 | 1.86 | 2.11 |

Table S4. Comparison of electrochemical performance between the current PCNF Na metal batteries and those prepared from state-of-the-art modified carbonaceous materials.

| Materials [Ref.]                                                    | Current density (mA cm <sup>-2</sup> ) | Areal capacity (mA h cm <sup>-2</sup> ) | Cycle number/hour | Coulombic efficiency (%) | Electrolyte                                          |
|---------------------------------------------------------------------|----------------------------------------|-----------------------------------------|-------------------|--------------------------|------------------------------------------------------|
| <b>Defect-engineered electrospun PCNF-800</b><br><br>(Current Work) | 1                                      | 1                                       | 600 cycles        | 99.8%                    | <b>NaSO<sub>3</sub>CF<sub>3</sub> (1M) in DEGDME</b> |
|                                                                     | 0.5                                    | 1                                       | 1500 h            |                          |                                                      |
|                                                                     | 1                                      | 1                                       | 4000 h            |                          |                                                      |
|                                                                     | 2                                      | 1                                       | 500 h             |                          |                                                      |
|                                                                     | 3                                      | 1                                       | 2000 h            |                          |                                                      |
| <b>CNTs* with oxygenic groups [39]</b>                              | 0.5                                    | 1                                       | 1000 cycles       | 99.8%                    | NaSO <sub>3</sub> CF <sub>3</sub> (1 M) in DEGDME    |
|                                                                     | 1                                      | 1                                       | 1600 cycles       | 99.9%                    |                                                      |
|                                                                     | 3                                      | 1                                       | 1000 cycles       | 99.8%                    |                                                      |
|                                                                     | 1                                      | 1                                       | 250 h             |                          |                                                      |
|                                                                     | 3                                      | 1                                       | 1100 h            |                          |                                                      |
|                                                                     | 3                                      | 3                                       | 320 h             |                          |                                                      |
|                                                                     | 5                                      | 8                                       | 310 h             |                          |                                                      |
| <b>Conductive carbon black [43]</b>                                 | 0.5                                    | 0.25                                    | >1000 cycles      | 99.8%                    | NaPF <sub>6</sub> (1 M) in DEGDME                    |
|                                                                     | 1                                      | 12                                      | >50 cycles        | 99.9%                    |                                                      |
| <b>Na@rGO composite [48]</b>                                        | 1                                      | 1                                       | 600 h             |                          | NaPF <sub>6</sub> (1 M) in DEGDME                    |
|                                                                     | 0.25                                   | 0.08                                    | 300 h             |                          | NaSO <sub>3</sub> CF <sub>3</sub> (1 M) in DEGDME    |
|                                                                     | 3                                      | 3                                       | 300 h             |                          | NaSO <sub>3</sub> CF <sub>3</sub> (1 M) in DEGDME    |
|                                                                     | 5                                      | 5                                       | 300 h             |                          | NaSO <sub>3</sub> CF <sub>3</sub> (1 M) in DEGDME    |
|                                                                     | 0.25                                   | 0.06                                    | 300 h             |                          | NaClO <sub>4</sub> (1 M) in EC/PC                    |
|                                                                     | 0.5                                    | 0.125                                   | 60 h              |                          | NaClO <sub>4</sub> (1 M) in EC/PC                    |
| <b>Na-carbonized wood [25]</b>                                      | 1                                      | 0.5                                     | 250 h             |                          | NaClO <sub>4</sub> (1 M) in EC: DEC                  |
|                                                                     | 1                                      | 1                                       | 500 h             |                          |                                                      |
| <b>Graphitized carbon microspheres/Na [44]</b>                      | 1                                      |                                         | 175 cycles        | 98.9%                    | NaPF <sub>6</sub> (1 M) in DEGDME                    |
|                                                                     | 0.5                                    | 1                                       | 3600 h            |                          |                                                      |
| <b>3D flexible carbon</b>                                           | 1                                      | 2                                       | 120 cycles        |                          | NaClO <sub>4</sub> (1 M) in                          |

|                                                                                  |      |     |             |        |                                                   |
|----------------------------------------------------------------------------------|------|-----|-------------|--------|---------------------------------------------------|
| <b>felt/Na [31]</b>                                                              |      |     |             |        | EC/PC                                             |
|                                                                                  | 3    | 2   | 120 cycles  |        | NaClO <sub>4</sub> (1 M) in EC/PC                 |
|                                                                                  | 5    | 2   | 120 cycles  |        | NaClO <sub>4</sub> (1 M) in EC/PC                 |
|                                                                                  | 3    | 3   | 200 cycles  |        | NaTFSI (1 M) in DOL/DME                           |
| <b>Macroporous catalytic carbon nanotemplate [41]</b>                            | 1    | 0.5 | 1200 cycles | 99.9%  | NaPF <sub>6</sub> (1 M) in DEGDME                 |
| <b>Sodium infiltrated Fe<sub>2</sub>O<sub>3</sub> coated carbon textile [46]</b> | 1    | 1   | 333 h       |        | NaClO <sub>4</sub> (1 M) in EC: DMC               |
|                                                                                  | 3    | 1   | 222 h       |        |                                                   |
|                                                                                  | 5    | 1   | 138 h       |        |                                                   |
| <b>Carbon paper with N-doped CNT*/Na [42]</b>                                    | 1    | 1   | 350 h       |        | NaPF <sub>6</sub> (1 M) in EC:PC                  |
|                                                                                  | 3    | 1   | 180 h       |        |                                                   |
|                                                                                  | 5    | 1   | 140 h       |        |                                                   |
|                                                                                  | 5    | 3   | 90 h        |        |                                                   |
| <b>N, S co-doped CNT* paper [47]</b>                                             | 1    | 1   | 500 h       |        | NaSO <sub>3</sub> CF <sub>3</sub> (1 M) in DEGDME |
|                                                                                  | 3    | 1   | 150 h       |        |                                                   |
|                                                                                  | 1    | 1   | 400 cycles  | 99.82% |                                                   |
|                                                                                  | 2    | 1   | 500 cycles  | 99.87% |                                                   |
|                                                                                  | 1    | 5   | 200 cycles  | 99.79% |                                                   |
| <b>N, O co-doped graphitized carbon fibers [38]</b>                              | 1    | 8   | ~100 cycles | 99.9%  | NaPF <sub>6</sub> (1 M) in DEGDME                 |
|                                                                                  | 2    | 8   | >120 cycles | 99.8%  |                                                   |
|                                                                                  | 0.5  | 1   | 800 h       |        |                                                   |
|                                                                                  | 1    | 1   | 1260 h      |        |                                                   |
| <b>Ultrathin graphene films [45]</b>                                             | 0.5  | 0.5 | 200 h       |        | NaPF <sub>6</sub> (1 M) in EC:DEC                 |
|                                                                                  | 0.25 | 1   | 60 h        |        |                                                   |
|                                                                                  | 1    | 1   | 200 h       |        |                                                   |
|                                                                                  | 2    | 1   | 125 h       |        |                                                   |
|                                                                                  | 2    | 3   | 300 h       |        |                                                   |
| <b>Carbon paper pressed onto Na [40]</b>                                         | 1    | 1   | 200 cycles  |        | NaClO <sub>4</sub> (1 M) in PC with 5 vol% FEC    |
|                                                                                  | 0.5  | 1   | 250 cycles  |        | NaSO <sub>3</sub> CF <sub>3</sub> (1 M) in DEGDME |
|                                                                                  | 5    | 1   | 1200 cycles |        | NaSO <sub>3</sub> CF <sub>3</sub> (1 M)           |



|  |  |  |  |  |           |
|--|--|--|--|--|-----------|
|  |  |  |  |  | in DEGDME |
|--|--|--|--|--|-----------|

\*CNT = carbon nanotube

**Supplementary Videos V1:** The video shows real-time melt infiltration of Na into the PCNF-800 electrode.

## References

- S1 C. Kim, S.-H. Park, J.-I. Cho, D.-Y. Lee, T.-J. Park, W.-J. Lee, K.-S. Yang, *J. Raman Spectrosc.*, 2004, **35**, 928.
- S2 G. Kresse, J. Furthmuller, *Phys. Rev. B*, 1996, **54**, 11169.
- S3 M. Ernzerhof, G.E. Scuseria, *J. Chem. Phys.*, 1999, **110(11)**, 5029.
- S4 B. Hammer, L.B. Hansen, J.K. Norskov, *Phys. Rev. B*, 1999, **59(11)**, 7413.
- S5 H. Huang, H.-H. Wu, C. Chi, J. Zhu, B. Huang, T.-Y.J.N. Zhang, *Nanoscale*, 2019, **11(40)**, 18758.
- S6 K. Lee, E.D. Murray, L.Z. Kong, B.I. Lundqvist, D.C. Langreth, *Phys. Rev. B*, 2010, **82(8)**.
- S7 K. Momma, F. Izumi, *J. Appl. Crystallogr.*, 2011, **44**, 1272.
